# Supplementary material for: Advancing clinical reasoning in virtual patients – development and application of a conceptual framework
Source: PubMed Central journal article supplement (PMC5827186; doi:10.3205/zma001159), 2018-02-15
Supplement: JME-35-12-s-001.pdf [file JME-35-12-s-001.pdf]

---

**Literature, websites, and videos**

---

Aagaard E, Teherani A, Irby DM. Effectiveness of the one-minute preceptor model for diagnosing the patient and the learner: Proof of concept. *Acad Med* 2004;79: 42-9.

Akturk AO, Sahin I. Literature Review on Metacognition and its Measurement. *Procedia Social and Behavioral Sciences* 2011; 15:3731-6.

All AC, Huycke LI. Serial concept maps: tools for concept analysis. *J Nurs Educ* 2007;46 (5):217-24.

Artino AR Jr. Think, feel, act: motivational and emotional influences on military students' online academic success. *J Comput High Educ* 2009; 21:146–166.

Artino AR Jr, Holmboe ES, Durning SJ. Control-value theory: Using achievement emotions to improve understanding of motivation, learning, and performance in medical education: AMEE Guide No. 64. *Med Teach* 2012; 34: e148–e160.

Artino AR, Cleary TJ, Dong T, Hemmer PA, Durning SJ. Exploring clinical reasoning in novices: a self-regulated learning microanalytic assessment approach. *Med Educ* 2014;48:280-91.

Audétat MC, Dory V, Nendaz M, Vanpee D, Pestiaux D, Junod Perron N, Charlin B. What is so difficult about managing clinical reasoning difficulties? *Med Educ* 2012; 46: 216–27.

Barrows HS, Pickell GC. Developing clinical problem-solving skills. A guide to more effective diagnosis and treatment. Norton Medical Books, W W Norton & Company Inc, New York, London 1991. ISBN 978-0-3937-1010-6

Ber R. The CIP (comprehensive integrative puzzle) assessment method. *Med Teach* 2003;25(2):171-6.

Bereiter C, Scardamalia M. *Expertlike Learner in Surpassing Ourselves: An Inquiry into the Nature and Implications of Expertise*. Chicago: Open Court, 1993, ISBN 0-8126-9204-7; 279.

Berner ES, Graber ML. Overconfidence as a cause of diagnostic error in medicine. *Am J Med*. 2008;121(5 suppl):S2–S23.

Beullens J, Struyf E, Van Damme B. Do extended matching multiple-choice questions measure clinical reasoning? *Med Educ* 39:410–417.

Bordage G. Prototypes and semantic qualifiers: From past to present. *Med Educ* 2007;41:1117-21.

Bowen JL. Educational Strategies to Promote Clinical Diagnostic Reasoning. *N Engl J Med* 2006;355:2217-25.

van Bruggen L, Manrique-van Woudenberg M, Spierenburg E, Vos J. Preferred question types for computer-based assessment of clinical reasoning: a literature study. *Perspect Med Educ* 2012; 1:162-171.

de Bruin AB, Schmidt HG, Rikers RM. The Role of Basic Science Knowledge and Clinical Knowledge in Diagnostic Reasoning: A Structural Equation Modeling Approach. *Acad Med* 2005;80(8):765-73.

Cary J, Kurtz S. Integrating clinical communication with clinical reasoning and the broader medical curriculum. *Patient Education and Counseling* 2013;92: 361-5.

Case SM, Swanson DB. *Constructing Written Test Questions For the Basic and Clinical Sciences*. National Board of Medical Examiners Philadelphia, PA.

[http://www.uclouvain.be/cps/ucl/doc/adeff/documents/EVA\\_Res\\_Ext\\_Questions\\_QCM.pdf](http://www.uclouvain.be/cps/ucl/doc/adeff/documents/EVA_Res_Ext_Questions_QCM.pdf)

Chamberland M, Mamede S, St-Onge C, Setrakian J, Bergeron L, Schmidt H. Self-explanation in learning clinical reasoning: the added value of examples and prompts. *Med Educ* 2015; 49(2):193-202.

---

- 
- Charlin B, Lubarsky S, Millette B, Crevier F, Audétat MC, Charbonneau A, Caire Fon N, Hoff L, Bourdy C. Clinical reasoning processes: unravelling complexity through graphical representation. *Med Educ* 2012;46: 454-63
- 
- Charlin B, Boshuizen HP, Custers EJ, Feltovich PJ. Scripts and clinical reasoning. *Med Educ* 2007;41(12):1178-84.
- 
- CMap Tool <http://cmap.ihmc.us/cmaptools/>
- 
- Cox R. Vicarious learning and case-based teaching: developing health science students' clinical reasoning skills. *Teaching and Learning Research Programme* 54 2008.
- 
- Croskerry, Singhal G, Mamede S. Cognitive debiasing 1: origins of bias and theory of debiasing. *BMJ Qual Saf* 2013;22:ii58–ii64.
- 
- Daley BJ, Torre DM. Concept maps in medical education: an analytical literature review. *Med Educ*. 2010;44(5):440-8.
- 
- Delany C, Golding C. Teaching clinical reasoning by making thinking visible: an action research project with allied health clinical educators. *BMC Med Educ* 2014;14:20.
- 
- Downes S. What is learning context? 2004. <http://www.downes.ca/post/18>
- 
- Durning S, Artino AR Jr, Pangaro L, van der Vleuten CP, Schuwirth L. Context and clinical reasoning: understanding the perspective of the expert's voice. *Med Educ* 2011;45: 927-38.
- 
- Durning SJ, Artino A, Boulet J, et al. The feasibility, reliability, and validity of a post-encounter form for evaluating clinical reasoning. *Med Teach* 2012;34:30–37.
- 
- Durning S, Dong T, Artino AR Jr, LaRochelle MJ, Pangaro LN, van der Vleuten C, Schuwirth L. Instructional Authenticity and Clinical Reasoning in Undergraduate Medical Education: A 2-Year, Prospective, Randomized Trial. *Mil Med* 2012;177(9): 38
- 
- Durning SJ, Lubarsky S, Torre D, Dory V, Holmboe E. Considering "Nonlinearity" Across the Continuum in Medical Education Assessment: Supporting Theory, Practice, and Future Research Directions. *J Contin Educ Health Prof* 2015;35(3): 232-43.
- 
- Durning S, Ting D, Artino AR, van der Vleuten C, Holmboe E, Schuwirth L. Dual processing theory and experts' reasoning: exploring thinking on national multiple-choice questions. *Perspect Med Educ* 2015; 4:168–175.
- 
- Elizondo-Omana RE, Morales-Gómez JA, Morquecho-Espinoza O, Hinojosa-Amaya JM, Villarreal-Silva EE, García-Rodríguez Mde L, Guzmán-López S. Teaching Skills to Promote Clinical Reasoning in Early Basic Science Courses. *Anat Sci Educ* 2010;3:267–271
- 
- Ely JW, Graber ML, Croskerry P. Checklists to Reduce Diagnostic Errors. *Acad Med*. 2011;86:307–13.
- 
- Epp CM, Bull S, Johnson MD. Visualising Uncertainty for Open Learner Model Users. 22nd Conference on User Modelling, Adaptation and Personalization (UMAP 2014), Aalborg, Denmark. 9-14
- 
- Ericsson KA. Deliberate practice and the acquisition and maintenance of expert performance in medicine and related domains. *Acad Med* 2004;79(10 suppl):S70-80.
- 
- Eva K. What every teacher needs to know about clinical reasoning. *Med Educ* 2005; 39: 98-106.
- 
- Ferreira AP, Ferreira RF, Rajgor D, Shah J, Menezes A, Pietrobon R. Clinical Reasoning in the Real World Is Mediated by Bounded Rationality: Implications for Diagnostic Clinical Practice Guideline. *PLoS ONE* 2010;5(4) e10265.
-

---

de Figueiredo AD. Learning Contexts: a Blueprint for Research. *Interactive Educational Multimedia* 2005; 11:127-39.

---

Fischer MR. Presentation at Dartmouth: Clinical Reasoning: A special case of Scientific Reasoning and Argumentation? Oct. 2014.

[http://media.dartmouth.edu/~screencasts/d1250j1/Leading\\_Voices\\_in\\_Medical\\_Education\\_-\\_Clinical\\_Rea\\_-\\_20141107\\_153657\\_6.html](http://media.dartmouth.edu/~screencasts/d1250j1/Leading_Voices_in_Medical_Education_-_Clinical_Rea_-_20141107_153657_6.html)

---

Fleming A, Cutrer W, Reimschisel T, Gigante J. You Too Can Teach Clinical Reasoning! *Pediatrics* 2012;130(5): 795-7.

---

Gauthier G, Lajoie SP. Do expert clinical teachers have a shared understanding of what constitutes a competent reasoning performance in case-based teaching? *Instr Sci* 2014; 42:579–94.

---

Graber ML. Educational strategies to reduce diagnostic error: can you teach this stuff? *Adv in Health Sci Educ Theory Pract* 2009; 14(Suppl 1): 63-9.

---

Greller W, Drachsler H. Translating Learning into Numbers: A Generic Framework for Learning Analytics. *Educational Technology & Society* 2012;15(3): 42-57.

---

Groothoff JW, Frenkel J, Tytgat GA, Vreede WB, Bosman DK, ten Cate OT. Growth of analytical thinking skills over time as measured with the MATCH test. *Med Educ* 2008; 42:1037-43.

---

Händel M, Artelt C, Weinert S. Assessing metacognitive knowledge: Development and evaluation of a test instrument. *Journal for Educational Research Online, Journal für Bildungsforschung Online* 2013; 5(2) 162-88.

---

Heitzmann N, Fischer F, Kühne-Eversmann L, Fischer MR. Enhancing Diagnostic Competence with Self-Explanation Prompts and Adaptable Feedback. *Med Educ* 2015;49(10):993-1003.

---

The writings of Hippocrates and Galen by Hippokrates, Galen, Coxe JR. Charles Rivers Editors (1846)

---

Horwitz LI, Moin T, Green ML. Development and Implementation of an Oral Sign-out Skills Curriculum. *J Gen Intern Med.* 2007;22(10): 1470-4.

---

Hrynchak P, Takahashi SG, Nayer M. Key-feature questions for assessment of clinical reasoning: a literature review. *Med Educ* 2014;48: 870–83.

---

iMedTrust. Adaptive Medical Education. <http://www.imedtrust.org/adaptive-medical-education/>

---

Irish College of General Practitioners. Modified Essays Questions (MEQ).

[http://www.icgp.ie/go/become\\_a\\_gp/micgp\\_examination/past\\_papers/modified\\_essay\\_question\\_meq\\_](http://www.icgp.ie/go/become_a_gp/micgp_examination/past_papers/modified_essay_question_meq_)

---

Kamnin C, O'Sullivan P, Deterding R, Younger M. A Comparison of Critical Thinking in Groups of Third-year Medical Students in Text, Video, and Virtual PBL Case Modalities. *Acad Med* 2003; 78:204-11.

---

Kassirer JP. Teaching clinical reasoning: case-based and coached. *Acad Med.* 2010;85(7):1118-24.

---

Kiesewetter J, Kager M, Lux R, Zwissler B, Fischer MR, Dietz I. German undergraduate medical students' attitudes and needs regarding medical errors and patient safety - A national survey in Germany. *Med Teach* 2014;36: 505-10.

---

Kiesewetter J, Ebersbach R, Görlitz A, Holzer M, Fischer Mr, Schmidmaier R. Cognitive problem solving patterns of medical students correlate with success in diagnostic case solutions. *PlosONE* 2013;8(8):e71486.

---

Kinchin IM, Hay DB. How a qualitative approach to concept map analysis can be used to aid learning by illustrating patterns of conceptual development. *Educ Res* 2000;42 (1):43–57.

---

- 
- Lajoie SP. Extending the scaffolding metaphor. *Instr Sc* 2005;33:541-57.
- 
- Lee A, Joynt GM, Lee AK, Ho AM, Groves M, Viantis AC, Ma RC, Fung CS, Aun CS. Using illness scripts to teach clinical reasoning skills to medical students. *Fam Med* 2010;42(4):255-61.
- 
- Leony D, Muñoz-Merino PJ, Ruipérez-Valiente JA, Martín-Caro DA, Kloos CD. Rule-based detection of emotions in the Khan Academy platform. In: International Workshop on Massive Open Online Courses, 15 -16 May 2014, Antigua, Guatemala.
- 
- Lubarsky S, Dory V, Duggan P, Gagnon R, Charlin B. Script concordance testing: From theory to practice: AMEE Guide No. 75. *Med Teach* 2013;35: 184-93.
- 
- Lucey C. From Problem List to Illness Scripts.  
[http://c.yimcdn.com/sites/www.improvediagnosis.org/resource/resmgr/EducationFiles/From\\_Problem\\_Lists\\_to\\_Illnes.pdf](http://c.yimcdn.com/sites/www.improvediagnosis.org/resource/resmgr/EducationFiles/From_Problem_Lists_to_Illnes.pdf)
- 
- Mamede S, Schmidt HG, Rikers R. Diagnostic errors and reflective practice in medicine. *J Eval Clin Pract* 2007;13:138-45.
- 
- Mandin H, Harasym P, Eagle C, Watanabe M. Developing a 'clinical presentation' curriculum at the University of Calgary. *Acad Med* 1995;70:186–93.
- 
- Marcum JA. The Role of Emotions in Clinical Reasoning and Decision Making. *Journal of Medicine and Philosophy* 2013; 38: 501–19.
- 
- Medical Education Scholarship and Support UofS. Illness Script Examples. 2015.  
<https://www.youtube.com/watch?v=MOUV8c9esul&feature=youtu.be>
- 
- Midgley C, Maehr ML, Hruda LZ, Anderman E, Anderman L, Freeman KE, Gheen M, Kaplan A, Kumar R, Middleton MJ, Nelson J, Roeser R, Urdan T. *Manual for the Patterns of Adaptive Learning Scales*. Ann Arbor, Mich: University of Michigan; 2000.
- 
- Moulton CA, Regehr G, Mylopoulos M, MacRae HM. Slowing down when you should: a new model of expert judgement. *Acad Med* 2007;82 (Suppl):109–16.
- 
- Nie Y, Li L, Duan Y, Chen P, Barraclough BH, Zhang M, Li J. Patient safety education for undergraduate medical students: A systematic review. *BMC Med Educ* 2011;11:33.
- 
- NMC Horizon Report 2013. <http://net.educause.edu/ir/library/pdf/HR2013.pdf>
- 
- Normak P, Pata K, Kaipainen M. An Ecological Approach to Learning Dynamics. *Educational Technology & Society* 2012;15 (3), 262–74.
- 
- Norman G. Research in clinical reasoning: past history and current trends. *Med Educ* 2005; 39:418-27
- 
- Page G, Bordage G, Allen T. Developing key-feature problems and examinations to assess clinical decision-making skills. *Acad Med* 1995;70(3):194-201.
- 
- Palmer EJ, Devitt PG. Assessment of higher order cognitive skills in undergraduate education: modified essay or multiple-choice questions? *BMC Med Educ*. 2007;7(49):1-7.
- 
- Patel R, Sandars J, Carr S. Clinical diagnostic decision-making in real life contexts: A trans-theoretical approach for teaching: AMEE Guide No. 95. *Med Teach* 2015;37(3):211-27.
- 
- Patient Safety Network. *WebM&M Cases & Commentaries*. <https://psnet.ahrq.gov/webmm>
- 
- Papp KK. Critical Thinking Behavior Scale (CTBS): A Validation Study.
- 
- Pitt MB, Borman-Shoap EC, Eppich WJ. Twelve tips for maximizing the effectiveness of game-based learning. *Med Teach* 2015;37:1013-7.
-

- 
- Power T. Strategic Thinking Concepts-SMART Tool. 2014.  
<https://www.youtube.com/watch?v=oHlyqqOZAz0&feature=youtu.be>
- 
- Pusic MV, Boutis K, Hatala R, Cook DA. Learning Curves in Health Professions Education. *Acad Med* 2015;90(8):1034-42.
- 
- Rencic J. Twelve tips for teaching expertise in clinical reasoning. *Med Teach* 2011;33: 887–892.
- 
- Retalis S, Papasalouros A, Psaromiligkos Y, Siscos S, Kargidis T. Towards Networked Learning Analytics - A concept and a tool. *Networked Learning* 2006.
- 
- Richards J. Critical Synthesis Package: Comprehensive Integrative Puzzle (CIP) . *MedEdPORTAL Publications*; 2013. <https://www.mededportal.org/publication/9561>
- 
- Ruipérez-Valiente JA, Muñoz-Merino PJ, Leonya D, Kloosa CD. ALAS-KA: A learning analytics extension for better understanding the learning process in the Khan Academy platform. *Computers in Human Behavior* 47 2015;139-48.
- 
- Schmidt HG, Rikers RM. How expertise develops in medicine: knowledge encapsulation and illness script formation. *Med Educ* 2007; 41: 1133-39.
- 
- Schmidt HG, Mamede S. How to improve the teaching of clinical reasoning: a narrative review and a proposal. *Med Educ* 2015;49(10):961-73.
- 
- School of Nursing and Midwifery, Faculty of Health, University of Newcastle. Clinical Reasoning Instructors Resources. [http://www.utas.edu.au/\\_\\_data/assets/pdf\\_file/0003/263487/Clinical-Reasoning-Instructor-Resources.pdf](http://www.utas.edu.au/__data/assets/pdf_file/0003/263487/Clinical-Reasoning-Instructor-Resources.pdf)
- 
- Semigarn HL, Linder JA, Gidengil C, Mehrotra A. Evaluation of symptom checkers for self diagnosis and triage: audit study. *BMJ* 2015;351:h3480
- 
- Shackleton-Jones N. Towards a Working Theory of Learning: The Affective Context Model. 2010.  
<http://www.aconventional.com/2010/05/towards-working-theory-of-learning.html>
- 
- Shackleton-Jones N. Understanding the Affective Context Model. 2010.  
<http://www.aconventional.com/2010/08/understanding-learning-affective.html>
- 
- Sharples M, Adams A, Ferguson R, Gaved M, McAndrew P, Rienties B, Weller M, Whitelock D. Open University Innovation Report 3. 2014  
[http://www.openuniversity.edu/sites/www.openuniversity.edu/files/The\\_Open\\_University\\_Innovating\\_Pedagogy\\_2014\\_0.pdf](http://www.openuniversity.edu/sites/www.openuniversity.edu/files/The_Open_University_Innovating_Pedagogy_2014_0.pdf)
- 
- Shum SB, Ferguson R. Social Learning Analytics. *Educational Technology & Society* 2012;15(3):3-26.
- 
- Society to improve Diagnosis in Medicine. Clinical Reasoning Toolkit.  
<http://www.improvediagnosis.org/?ClinicalEducation>
- 
- Stiegler M. Understanding and Preventing Cognitive Errors in Healthcare. Stanford University 2014.  
<https://www.youtube.com/watch?v=OXcGciywtgM&feature=youtu.be>
- 
- Tempelaar DT, Rienties B, Giesbers B. In search for the most informative data for feedback generation: Learning analytics in a data-rich context. *Computers in Human Behavior* 47 2015; 157-67.
- 
- Torre DM, Durning SJ, Daley BJ. Twelve tips for teaching with concept maps in medical education. *Med Teach* 2013;35(3):201-8.
- 
- University of Connecticut. Teacher-centered vs Learner-centered paradigms.  
<http://assessment.uconn.edu/docs/TeacherCenteredVsLearnerCenteredParadigms.pdf>
-

Verbert K, Manouselis N, Drachsler H, Duval E. Dataset-Driven Research to Support Learning and Knowledge Analytics. *Educational Technology & Society* 2012;15(3):133-48.

Vink SC, van Tartwijk J, Bolk J, Verloop N. Integration of clinical and basic sciences in concept maps: a mixed-method study on teacher learning. *BMC Medical Education* 2015; 15:20

Wallden S, Mäkinen E. Educational Data Mining and Problem-Based Learning. *Informatics in Education* 2014;13(1):141-56.

West DC, Park JK, Pomeroy JR, Sandoval J. Concept mapping assessment in medical education: a comparison of two scoring systems. *Med Educ* 2002;36:820–6.

WHO Guidelines on a Patient Safety Curriculum.  
<http://www.who.int/patientsafety/education/curriculum/download/en/>

WHO Learning from error video and booklet.  
[http://www.who.int/patientsafety/education/vincristine\\_download/en/](http://www.who.int/patientsafety/education/vincristine_download/en/)

Wikipedia. Self-regulated learning. [https://en.wikipedia.org/wiki/Self-regulated\\_learning](https://en.wikipedia.org/wiki/Self-regulated_learning)

Wikipedia. Shared Decision Making. [https://en.wikipedia.org/wiki/Shared\\_decision-making](https://en.wikipedia.org/wiki/Shared_decision-making)

Williams PA. A six-item mnemonic to reduce cognitive errors during medical diagnosis. Poster session presented at: Diagnostic error in medicine. 3rd International conference of the Society for Medical Decision Making, 2010 October 25–27. Toronto, Canada.

Wolpaw T, Papp KK, Bordage G. Using SNAPPS to Facilitate the Expression of Clinical Reasoning and Uncertainties: A Randomized Comparison Group Trial. *Acad Med* 2009; 84(4): 517-23.

Woods NN. Science is fundamental: the role of biomedical knowledge in clinical reasoning. *Med Educ* 2007;41: 1173-77.

Zimmerman B. Self-Regulated Learning and Academic Achievement: An overview. *Educational Psychologist* 1990; 25(1):3-17

## Interviews

| Interview partner               | Topic                                                                            |
|---------------------------------|----------------------------------------------------------------------------------|
| Two healthcare educators        | Implementation of a clinical reasoning course for undergraduate medical students |
| Healthcare educator             | Team reasoning                                                                   |
| Healthcare education researcher | Learning from errors                                                             |
| Computer scientist              | Concept mapping to visualize clinical reasoning                                  |
| Healthcare professional         | Clinical reasoning and management decisions                                      |

## Online courses

University of Technology Delft. Creative Problem Solving and Decision Making. MOOC 2015.  
<https://courses.edx.org/courses/course-v1:DelftX+TPM1x+2T2015/info>

University of Michigan. Instructional Methods in Health Professions Education. MOOC 2015.  
<https://www.coursera.org/course/instructmethodshpe>

University of California San Francisco. Clinical Problem Solving. MOOC 2015.  
<https://www.coursera.org/course/clinprobsolv>
