# Supplementary material for: Advancing clinical reasoning in virtual patients – development and application of a conceptual framework
Source: PubMed Central journal article supplement (PMC5827186; doi:10.3205/zma001159), 2018-02-15
Supplement: JME-35-12-s-003.pdf [file JME-35-12-s-003.pdf]

| Concept                                 | Findings                                                                                                                                                                                                                                                                                                                                                                                                                                                                                                                                                                                                                                                                                                                                                                                     |
|-----------------------------------------|----------------------------------------------------------------------------------------------------------------------------------------------------------------------------------------------------------------------------------------------------------------------------------------------------------------------------------------------------------------------------------------------------------------------------------------------------------------------------------------------------------------------------------------------------------------------------------------------------------------------------------------------------------------------------------------------------------------------------------------------------------------------------------------------|
| Context (learning and clinical context) |                                                                                                                                                                                                                                                                                                                                                                                                                                                                                                                                                                                                                                                                                                                                                                                              |
| Time                                    | <ul style="list-style-type: none"> <li>Time constraints for learning [e.g. 24, 49] vs. encouraging learner to pause and reflect [e.g. 50]</li> <li>Typically time is a static component in VPs, learners are either rewarded for spending a long time on the VP [e.g. CASUS [54]] or for a quick problem solving approach, in which case a timer may be present [e.g. OpenLabyrinth [<a href="http://vpsystems.virtualpatients.net">http://vpsystems.virtualpatients.net</a>]]</li> </ul>                                                                                                                                                                                                                                                                                                    |
| Authenticity, cognitive load            | <ul style="list-style-type: none"> <li>The design of VP influences the balance between authenticity &amp; complexity [e.g. 51]</li> <li>Cognitive load of VPs is related to errors [e.g. 51]</li> <li>VPs offer a controlled/safe environment in which teachers can focus on the learner [e.g. 32]</li> <li>How does the transfer from virtual to real world work? [e.g. 31]</li> <li>VPs are often based on fictive patient stories [e.g. 52], but are often implemented to prepare for real patient encounters [e.g. 53]</li> </ul>                                                                                                                                                                                                                                                        |
| Emotions                                | <ul style="list-style-type: none"> <li>Emotions of the <b>patient</b> are more common in VPs to train communication skills than in clinical reasoning VP formats [e.g. 54, 55]</li> <li>Emotions of the <b>learner</b> during interaction with VP are explored [e.g. 51, 56]</li> </ul>                                                                                                                                                                                                                                                                                                                                                                                                                                                                                                      |
| Learner-centeredness                    |                                                                                                                                                                                                                                                                                                                                                                                                                                                                                                                                                                                                                                                                                                                                                                                              |
| Feedback                                | <ul style="list-style-type: none"> <li>Feedback is an important determinant for engagement [e.g. 57] and varies from immediate feedback to feedback at the end of a scenario.</li> <li>Different/adaptable feedback mechanisms have been implemented [e.g. 51, 31], but typically it is quantitative (e.g. list of correct diagnoses) [VP systems [<a href="http://vpsystems.virtualpatients.net">http://vpsystems.virtualpatients.net</a>]]</li> </ul>                                                                                                                                                                                                                                                                                                                                      |
| Adaptability                            | <ul style="list-style-type: none"> <li>VPs are typically tailored to the needs and level of a specific learner group, not on an individual level [<a href="http://vpsystems.virtualpatients.net">http://vpsystems.virtualpatients.net</a>], but</li> <li>Adaption of level of difficulty helps avoiding an expertise reversal effect [e.g. 7] and the</li> <li>Optimal design may depend on learner level [e.g. 7], meaning offering multiple learning strategies in varying context [e.g. 32, 47]</li> <li>Overall, there is a discrepancy between adaptability and standardization of instruction [e.g. <a href="https://members.aamc.org/eweb/upload/Effective%20Use%20of%20Educational.pdf">https://members.aamc.org/eweb/upload/Effective%20Use%20of%20Educational.pdf</a>]]</li> </ul> |
| Motivation, Engagement                  | <ul style="list-style-type: none"> <li>Motivation through assessment [e.g. 58]</li> <li>Importance of making a VP engaging [e.g. 59]</li> </ul>                                                                                                                                                                                                                                                                                                                                                                                                                                                                                                                                                                                                                                              |
| Teaching/Assessment                     |                                                                                                                                                                                                                                                                                                                                                                                                                                                                                                                                                                                                                                                                                                                                                                                              |
| Methods                                 | <ul style="list-style-type: none"> <li>VPs are assessment methods [e.g. 11], but also include assessment components, which are typically quantitative methods, such as multiple choice questions or decision points. [VP systems [<a href="http://vpsystems.virtualpatients.net">http://vpsystems.virtualpatients.net</a>]]</li> <li>Applying more qualitative methods, such think-aloud approaches [e.g. 60] or concept mapping have been studied [e.g. 61], but are not commonly used.</li> <li>Many cases are required to assess clinical reasoning skills [e.g. 7]</li> <li>Mimic real patient management vs reliability [e.g. 44]</li> </ul>                                                                                                                                            |
| Scoring                                 | <ul style="list-style-type: none"> <li>Assess and score all steps involved in the clinical reasoning process, but a detailed scoring of a stepwise approach may oppose non-analytical reasoning approaches [e.g. 7]</li> <li>Scoring can cause negative emotions, such as frustration, thus, transparency of scoring is important [e.g. 51, 62]</li> <li>The scoring approach depends on the VP format [e.g. 63]</li> <li>Scoring metrics vary, e.g. costs or time are included in some VPs [e.g. 47], but, specific clinical reasoning process scores are often not provided [VP systems [<a href="http://vpsystems.virtualpatients.net">http://vpsystems.virtualpatients.net</a>]]</li> </ul>                                                                                              |
| Communication                           | <ul style="list-style-type: none"> <li>Clear communication is an indicator for organized clinical reasoning skills [e.g. 47], but VPs are often designed to train either communication or clinical reasoning skills [e.g. 64]</li> </ul>                                                                                                                                                                                                                                                                                                                                                                                                                                                                                                                                                     |
| Patient-centeredness [e.g. 48]          |                                                                                                                                                                                                                                                                                                                                                                                                                                                                                                                                                                                                                                                                                                                                                                                              |
| Patient Safety & Errors                 | <ul style="list-style-type: none"> <li>VPs provide a safe environment for learners and educators [e.g. <a href="https://members.aamc.org/eweb/upload/Effective%20Use%20of%20Educational.pdf">https://members.aamc.org/eweb/upload/Effective%20Use%20of%20Educational.pdf</a>] and errors can be made, by making a wrong choice or giving a wrong answer, however, typical errors/biases of clinical decision making, such a anchoring or premature closure typically cannot actively made by the learner [VP systems [<a href="http://vpsystems.virtualpatients.net">http://vpsystems.virtualpatients.net</a>]]</li> <li>Learning from errors is important [e.g. 47], but implementation is limited.</li> </ul>                                                                              |

|                                            |                                                                                                                                                                                                                                                                                                                                                                                                                                                                                       |
|--------------------------------------------|---------------------------------------------------------------------------------------------------------------------------------------------------------------------------------------------------------------------------------------------------------------------------------------------------------------------------------------------------------------------------------------------------------------------------------------------------------------------------------------|
| Biases                                     | <ul style="list-style-type: none"> <li>Biases are usually not explicitly covered in clinical reasoning VPs, but studies have been implemented [e.g. 54] exploring the role of biases while learning with VPs.</li> </ul>                                                                                                                                                                                                                                                              |
| Management decisions                       | <ul style="list-style-type: none"> <li>Management decision are usually included in the VP scenario before the conclusion of the scenario [VP systems [<a href="http://vpsystems.virtualpatients.net">http://vpsystems.virtualpatients.net</a>]]</li> </ul>                                                                                                                                                                                                                            |
| Overconfidence                             | <ul style="list-style-type: none"> <li>Level of confidence with a differential or final diagnosis is implemented in some VPs [e.g. DxR [<a href="http://vpsystems.virtualpatients.net">http://vpsystems.virtualpatients.net</a>]]</li> </ul>                                                                                                                                                                                                                                          |
| Psychological Theories                     |                                                                                                                                                                                                                                                                                                                                                                                                                                                                                       |
| Illness Scripts                            | <ul style="list-style-type: none"> <li>Patient's illness scripts are implicitly included in VPs, but typically not explicitly visible to the learner and</li> <li>the learner typically has to enter (or is provided) a list of problems, differential diagnoses, tests to perform, and management decisions [VP systems [52]]</li> </ul>                                                                                                                                             |
| Knowledge Encapsulation                    | <ul style="list-style-type: none"> <li>Often, VPs are long [e.g. 52], which hinders working through many VPs</li> <li>Longitudinal integration of VPs, to link basic and clinical knowledge [e.g. 65]</li> </ul>                                                                                                                                                                                                                                                                      |
| Metacognition                              | <ul style="list-style-type: none"> <li>Role of metacognitive self-awareness of the VP [e.g. 66]</li> <li>Metacognitive strategies, such as questions for self-reflection, self-assessment or self-explanation are implemented in VPs [VP systems [<a href="http://vpsystems.virtualpatients.net">http://vpsystems.virtualpatients.net</a>]]</li> <li>Self-pacing, non-threatening environment, feedback and flexibility important requirements for metacognition [e.g. 38]</li> </ul> |
| Pattern recognition - analytical reasoning | <ul style="list-style-type: none"> <li>VPs typically aim to teach analytical reasoning in a step-wise approach [e.g. 49]</li> </ul>                                                                                                                                                                                                                                                                                                                                                   |
